# Supplementary material for: First-passage times in protein folding: exploring the native-like states vs. overcoming the free energy barrier
Source: Royal Society of Chemistry journal article supplement (doi:10.1039/d0cp06560a), 2021-01-01
Supplement: d0cp06560a1.pdf [file d0cp06560a1.pdf]

**Electronic Supplementary Information for:**  
**“First-Passage Times in Protein Folding:**  
**Exploring the Native-Like States vs Overcoming**  
**the Free Energy Barrier”**

Sergei F. Chekmarev<sup>\*,†,‡</sup>

*†Institute of Thermophysics, SB RAS, 630090 Novosibirsk, Russia*

*‡Department of Physics, Novosibirsk State University, 630090 Novosibirsk, Russia*

E-mail: [chekmarev@itp.nsc.ru](mailto:chekmarev@itp.nsc.ru)

# 1 Deviation from the Transition State

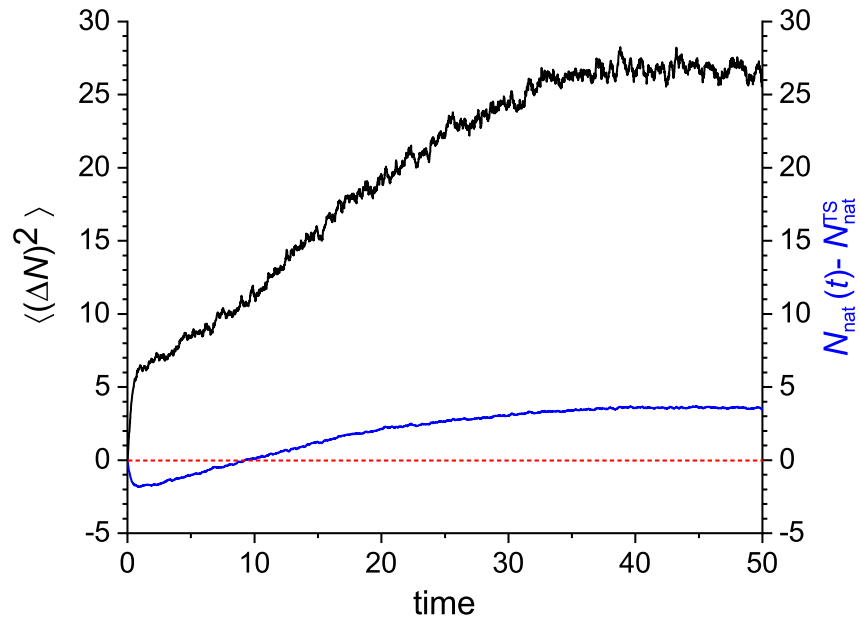

Figure S1:  $T = 0.2$ ,  $\gamma = 10M/\tau$ , and ten thousand MD trajectories. The mean square (black curve) and mean (blue curve) deviations from the transition state.

## 2 A Simple Model for Single-Exponential First-Passage Time Distribution

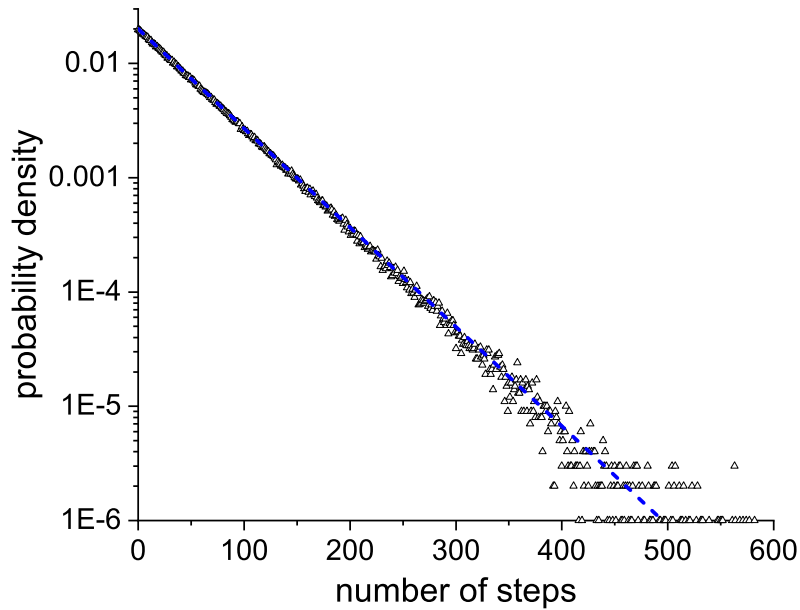

Figure S2: A simulated distribution of first-passage times. Random number generator with a uniform distribution of the numbers between 0 and 1 was used. In the ensemble of  $10^6$  trajectories, each trajectory was started from a random number and proceeded through the numbers until the value of  $0.7 \pm 0.01$  was achieved. The label corresponds to the simulated trajectories, and the blue dashed line shows an exponential fit to the simulate distribution with the decay rate of 50.0.

### 3 Friction Constant $\gamma = 10M/\tau$

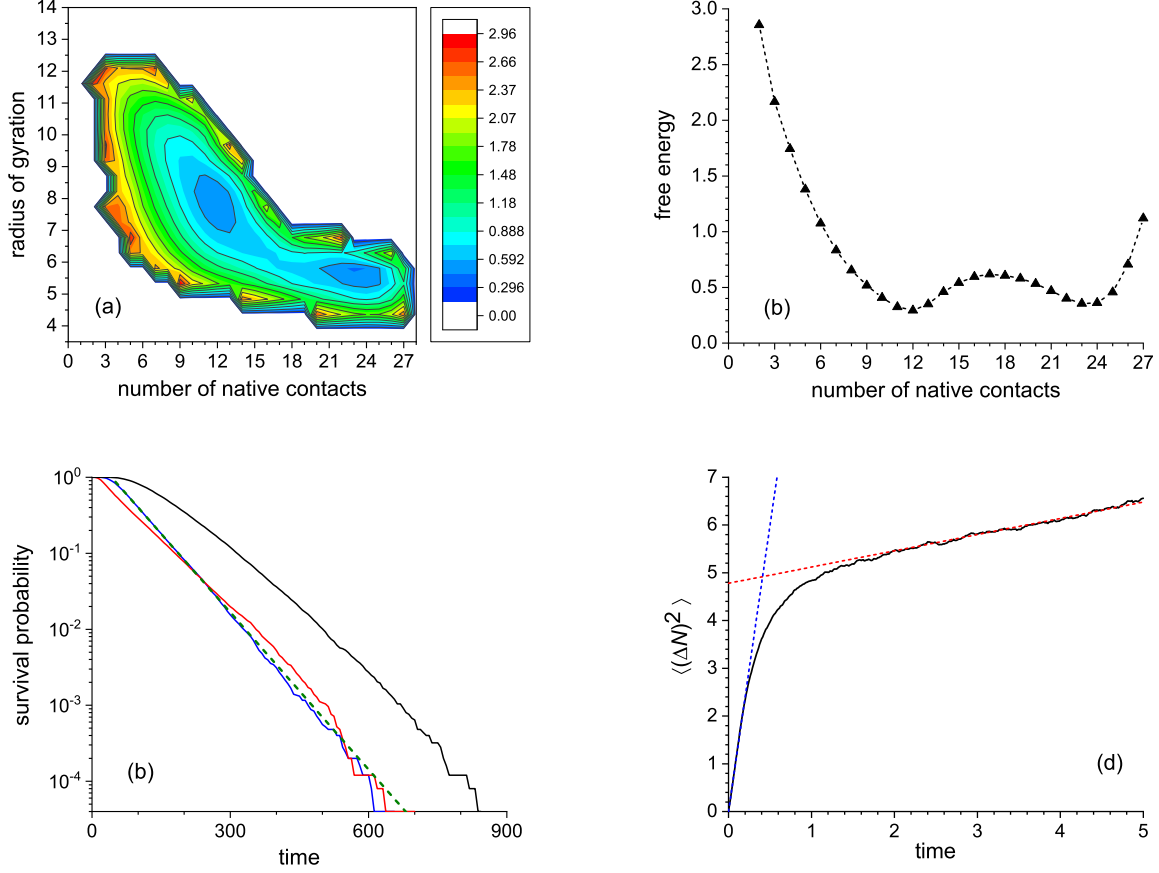

Figure S3:  $T = 0.15$ . (a) The free energy surface  $F(N_{\text{nat}}, R_g)$ , and (b) free energy profile  $F(N_{\text{nat}})$ . (c) First-passage time distributions in the form of survival probabilities: the U  $\rightarrow$  NL trajectories (blue), the NL  $\rightarrow$  N trajectories (red), and the U-N trajectories (black); the dashed green line denotes an exponential fit to the U  $\rightarrow$  NL distribution. (d) The time-dependent mean-square deviation from the transition state in the number of native contacts (black curve); the blue and red dashed lines are the linear fits to the curve for short and long times, respectively.

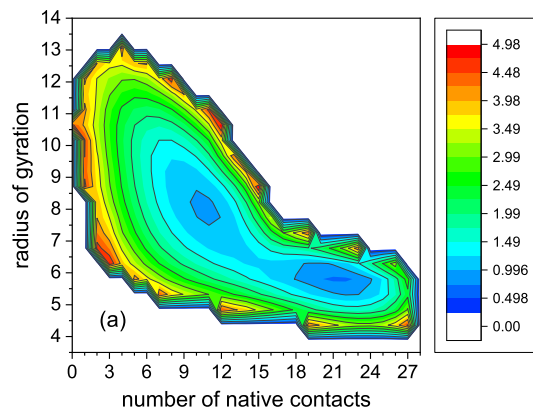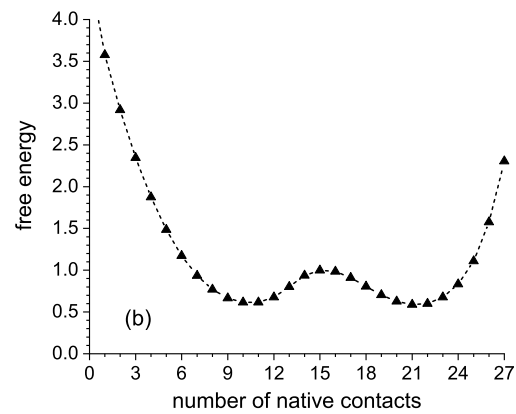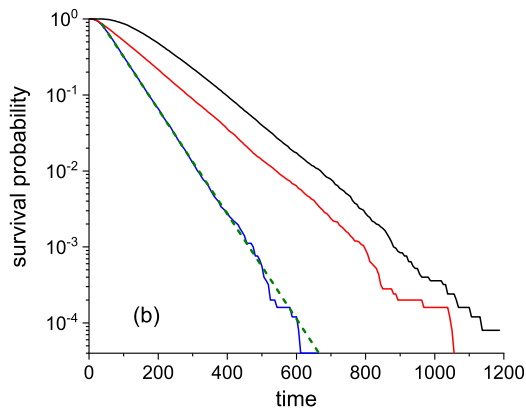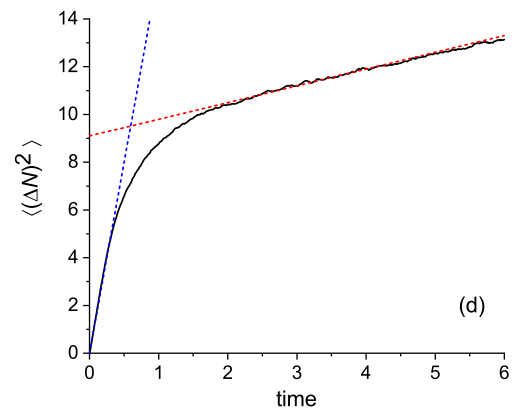

Figure S4:  $T = 0.25$ . The notations are as in Fig. S3.

Table S1: Parameters to calculate the  $U \rightarrow NL$  transition time with the Kramers formula

| $T$          | 0.1  | 0.15 | 0.2  | 0.25 | 0.3  |
|--------------|------|------|------|------|------|
| $\Delta F$   | 0.26 | 0.33 | 0.36 | 0.38 | 0.34 |
| $F_U''^a$    | 0.27 | 0.29 | 0.27 | 0.23 | 0.24 |
| $F_U''^b$    | 0.29 | 0.29 | 0.25 | 0.23 | 0.23 |
| $F_{TS}''^a$ | 0.14 | 0.19 | 0.21 | 0.26 | 0.32 |
| $F_{TS}''^b$ | 0.10 | 0.19 | 0.22 | 0.28 | 0.32 |
| $D_{TS}$     | 4.5  | 6.0  | 6.5  | 8.0  | 9.0  |

<sup>a</sup> from the polynomial approximation.

<sup>b</sup> calculated as the three-point finite difference.

Table S2: Comparison of folding times

| $T$                                      | 0.1   | 0.15  | 0.2   | 0.25  | 0.3   |
|------------------------------------------|-------|-------|-------|-------|-------|
| $\langle t_{U \rightarrow NL} \rangle^a$ | 93.0  | 63.0  | 59.0  | 63.0  | 63.0  |
| $\langle t_{U \rightarrow NL} \rangle^b$ | 48.7  | 24.9  | 21.0  | 15.2  | 8.4   |
| $\langle t_{U \rightarrow NL} \rangle^c$ | 144.6 | 103.4 | 92.5  | 89.9  | 85.0  |
| $\langle t_{NL \rightarrow N} \rangle^c$ | 105.8 | 81.0  | 92.0  | 133.8 | 235.3 |
| $\langle t_{U \rightarrow N} \rangle^c$  | 250.4 | 184.4 | 184.5 | 223.7 | 320.3 |

<sup>a</sup> calculated from the slope of the simulated  $U \rightarrow NL$  decay curve.

<sup>b</sup> Kramers formula [Eq. (2), the main text] for the average values of  $F_U''$  and  $F_{TS}''$  (Table S1).

<sup>c</sup> simulated times.

## 4 Friction Constant $\gamma = 3M/\tau$

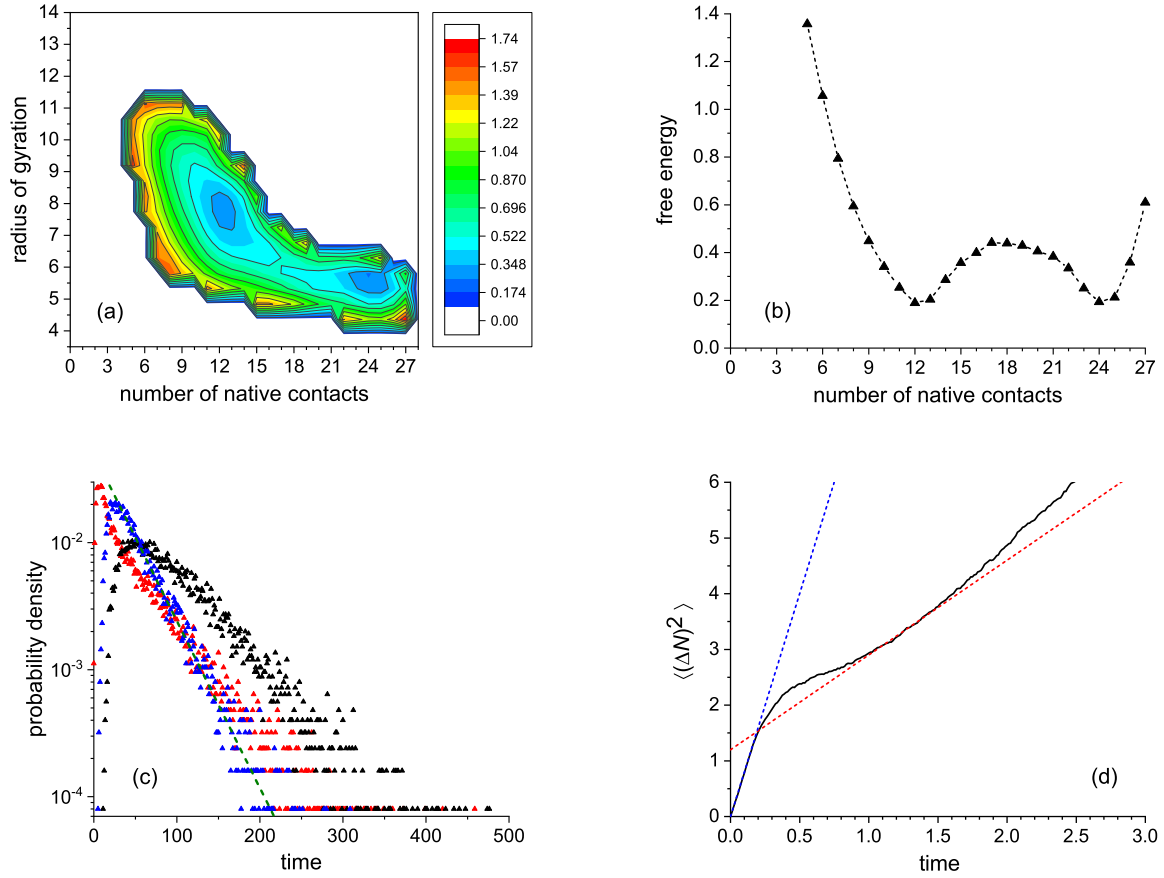

Figure S5:  $T = 0.1$ . (a) The free energy surface  $F(N_{\text{nat}}, R_g)$ , and (b) free energy profile  $F(N_{\text{nat}})$ . (c) First-passage time distributions: the U  $\rightarrow$  NL trajectories (blue), the NL  $\rightarrow$  N trajectories (red), and the U-N trajectories (black); the dashed green line denotes an exponential fit to the U  $\rightarrow$  NL distribution. (d) The time-dependent mean-square deviation from the transition state in the number of native contacts (black curve); the blue and red dashed lines are the linear fits to the curve for short and long times, respectively.

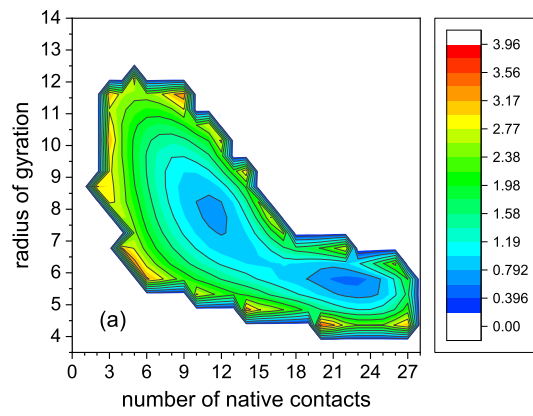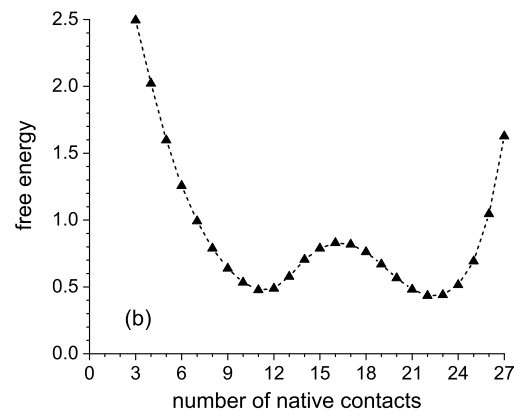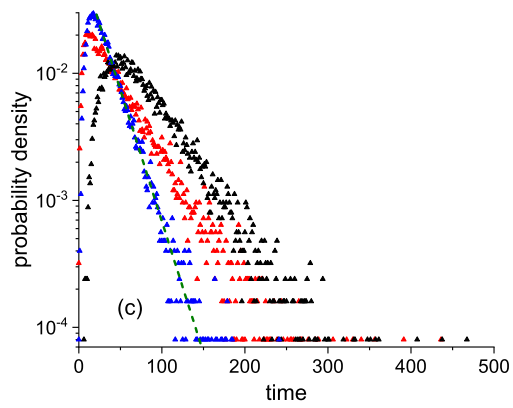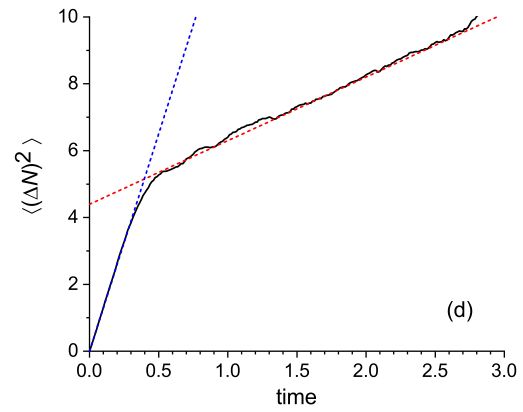

Figure S6:  $T = 0.2$ . The notations are as in Fig. S5.



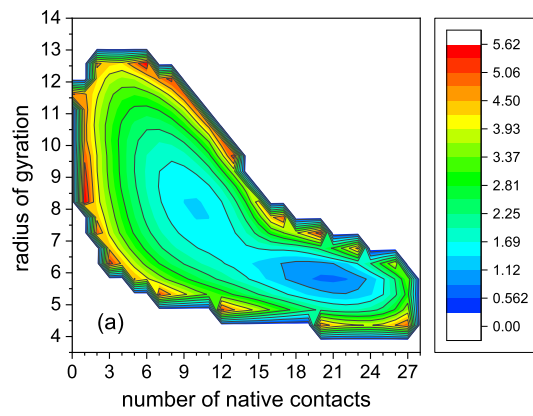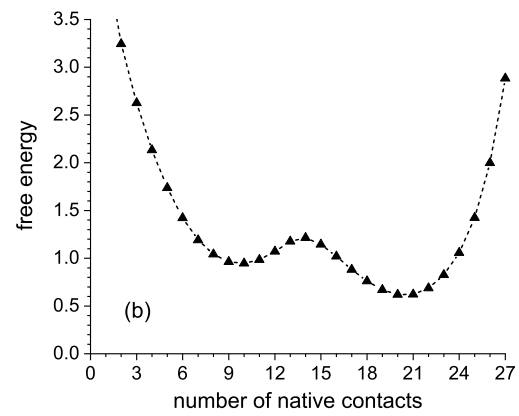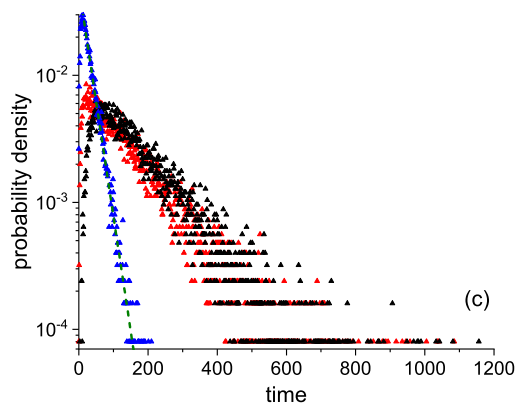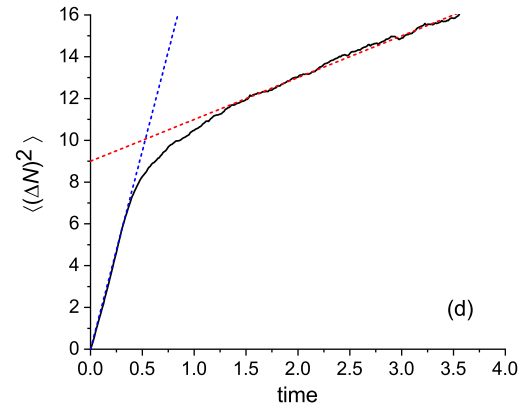

Figure S7:  $T = 0.3$ . The notations are as in Fig. S5.

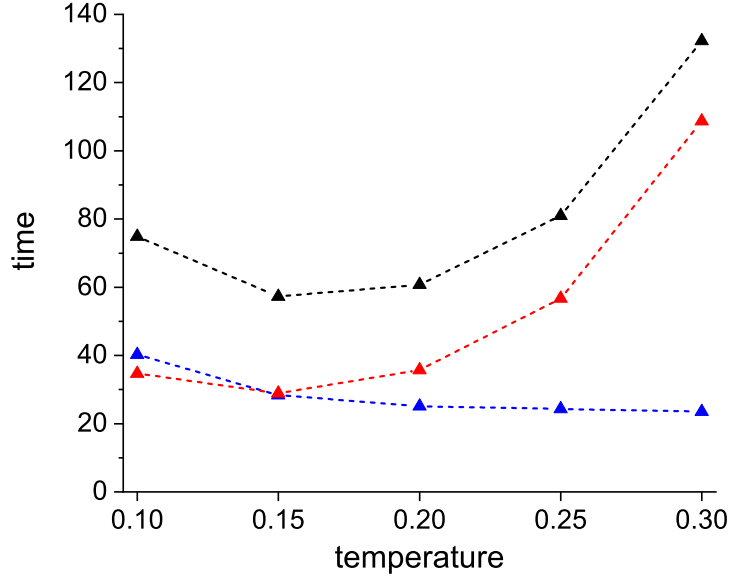

Figure S8: The simulated MFPT times: the U → NL times (blue), NL → N times (red), and U → N times (black). The dashed lines are to guide the eye.

Table S3: Parameters to calculate the U → NL transition time with the Kramers rate formula

| $T$          | 0.1  | 0.15 | 0.2  | 0.25 | 0.3  |
|--------------|------|------|------|------|------|
| $\Delta F$   | 0.25 | 0.32 | 0.35 | 0.35 | 0.27 |
| $F_U''^a$    | 0.28 | 0.30 | 0.27 | 0.24 | 0.23 |
| $F_U''^b$    | 0.28 | 0.29 | 0.26 | 0.25 | 0.23 |
| $F_{TS}''^a$ | 0.13 | 0.17 | 0.23 | 0.28 | 0.33 |
| $F_{TS}''^b$ | 0.21 | 0.18 | 0.23 | 0.29 | 0.33 |
| $D_{TS}$     | 4.0  | 5.8  | 6.5  | 8.5  | 9.5  |

<sup>a</sup> from the polynomial approximation.

<sup>b</sup> calculated as the three-point finite difference.

Table S4: Comparison of Folding Times

| $T$                                      | 0.1  | 0.15 | 0.2  | 0.25 | 0.3   |
|------------------------------------------|------|------|------|------|-------|
| $\langle t_{U \rightarrow NL} \rangle^a$ | 33.0 | 23.0 | 21.0 | 23.0 | 24.0  |
| $\langle t_{U \rightarrow NL} \rangle^b$ | 42.6 | 26.8 | 18.5 | 10.7 | 6.5   |
| $\langle t_{U \rightarrow NL} \rangle^c$ | 40.2 | 28.4 | 25.1 | 24.3 | 23.5  |
| $\langle t_{NL \rightarrow N} \rangle^c$ | 34.7 | 28.9 | 35.7 | 56.7 | 108.7 |
| $\langle t_{U \rightarrow N} \rangle^c$  | 74.9 | 57.3 | 60.8 | 81.0 | 132.2 |

<sup>a</sup> calculated from the slope of the simulated  $U \rightarrow NL$  decay curve.

<sup>b</sup> Kramers formula [Eq. (2), the main text] for the average values of  $F''_U$  and  $F''_{TS}$  (Table S3).

<sup>c</sup> simulated times.

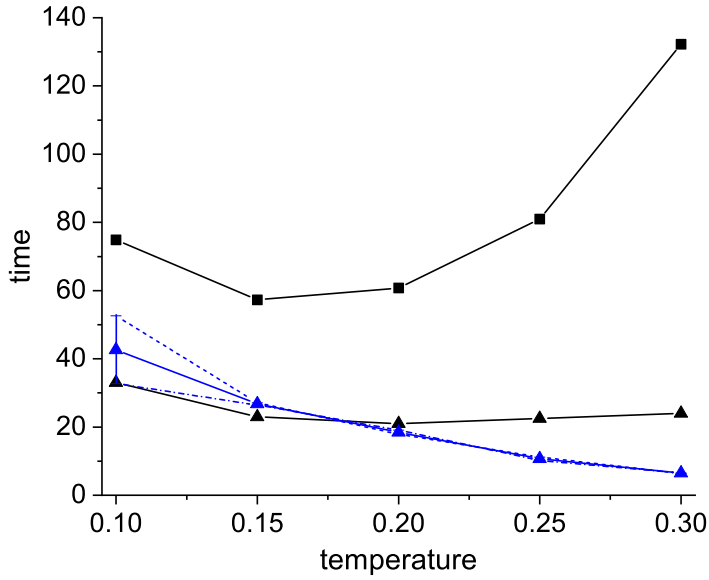

Figure S9: The black squares are for the  $\langle t_{U \rightarrow N} \rangle$  times from simulations, the black triangles denote the  $\langle t_{U \rightarrow NL} \rangle$  times calculated from the slopes of the simulated  $U \rightarrow NL$  decay curves, and the blue triangles are for  $\langle t_{U \rightarrow NL} \rangle$  times from Eq. (2) of the main text with the average values of  $F''_U$  and  $F''_{TS}$  (the dashed and dash-dotted blue lines indicate the results for  $F''_U$  and  $F''_{TS}$  obtained by the polynomial approximation of the FEP and calculated by finite-differences, respectively). In all cases, the lines are to guide the eye.

## 5 Friction Constant $\gamma = 50M/\tau$

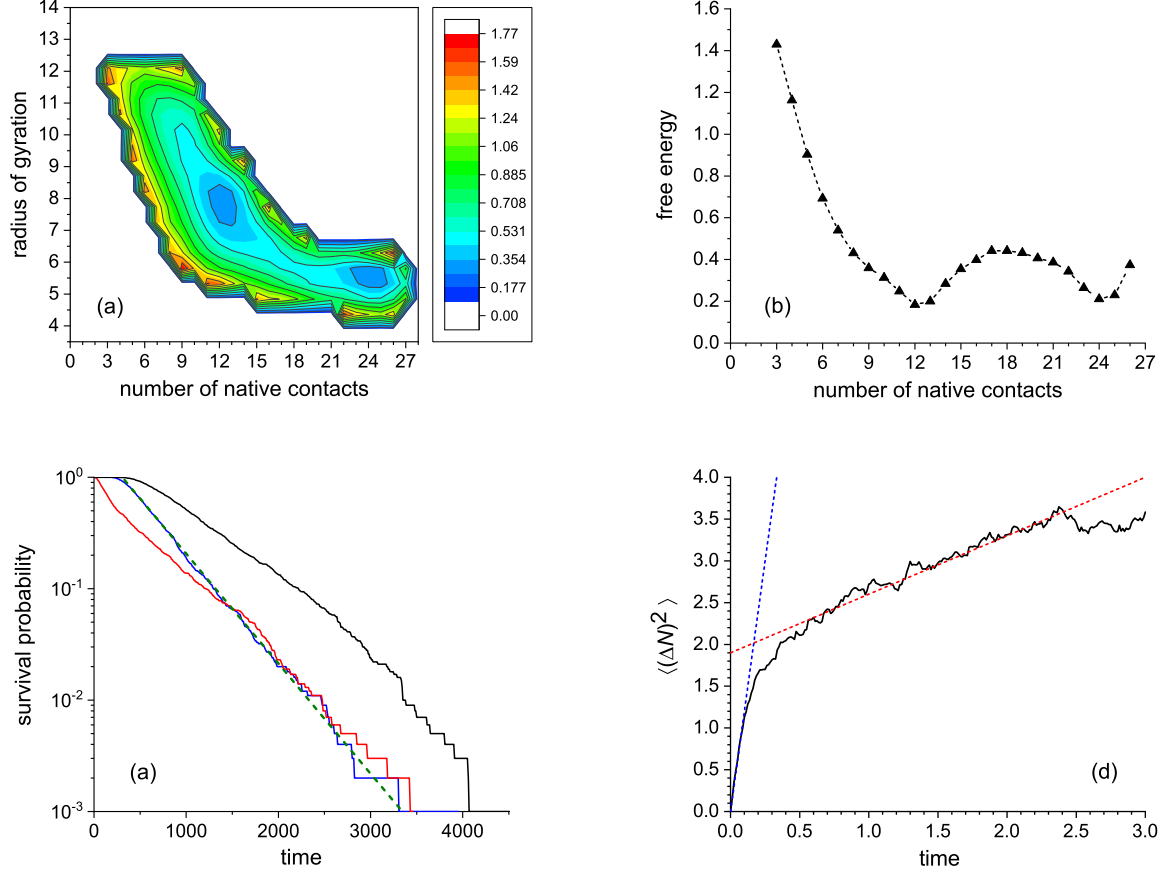

Figure S10:  $T = 0.1$ . (a) The free energy surface  $F(N_{\text{nat}}, R_g)$ , and (b) free energy profile  $F(N_{\text{nat}})$ . (c) First-passage time distributions in the form of survival probabilities: the U → NL trajectories (blue), the NL → N trajectories (red), and the U-N trajectories (black); the dashed green line denotes an exponential fit to the U → NL distribution. (d) The time-dependent mean-square deviation from the transition state in the number of native contacts (black curve); the blue and red dashed lines are the linear fits to the curve for short and long times, respectively.

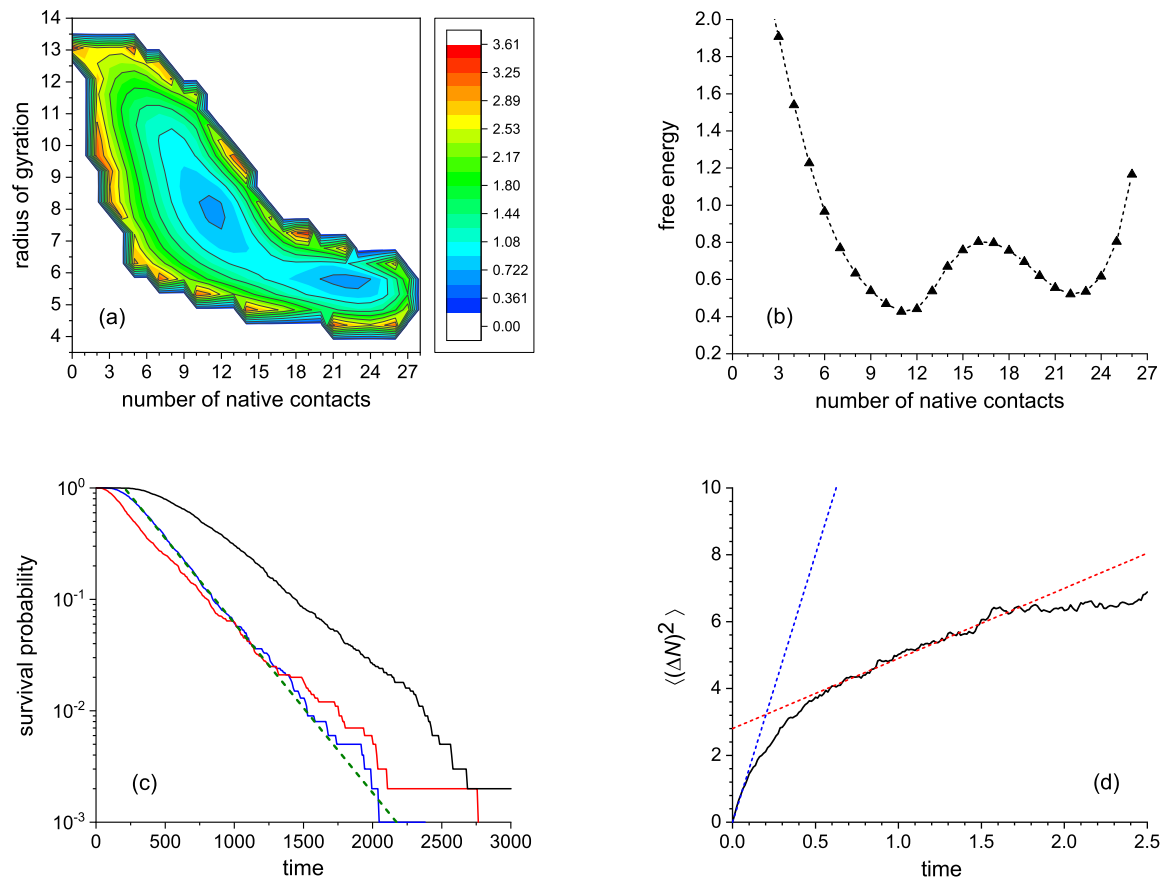

Figure S11:  $T = 0.2$ . The notations are as in Fig. S10.

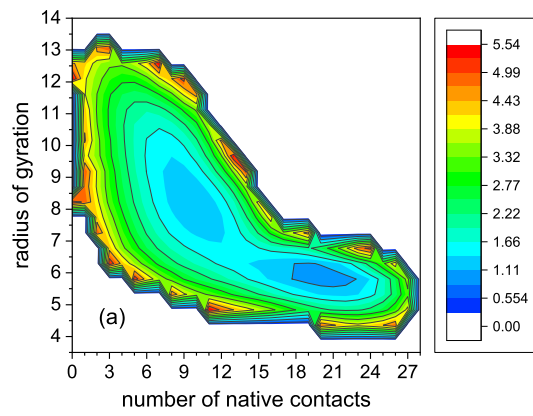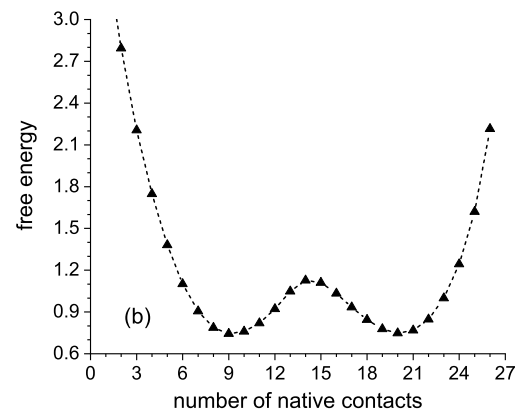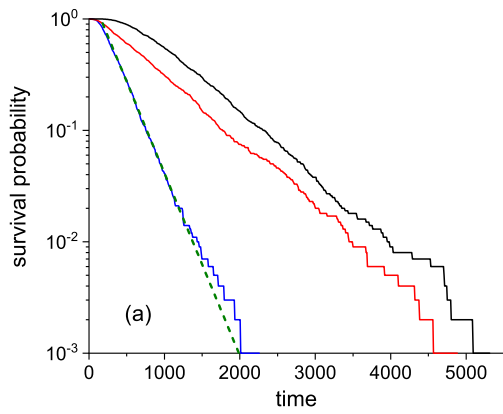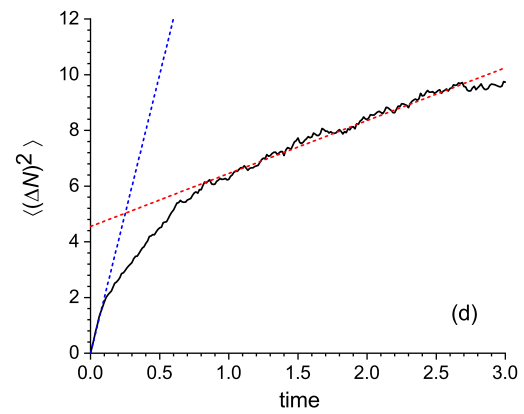

Figure S12:  $T = 0.3$ . The notations are as in Fig. S10.

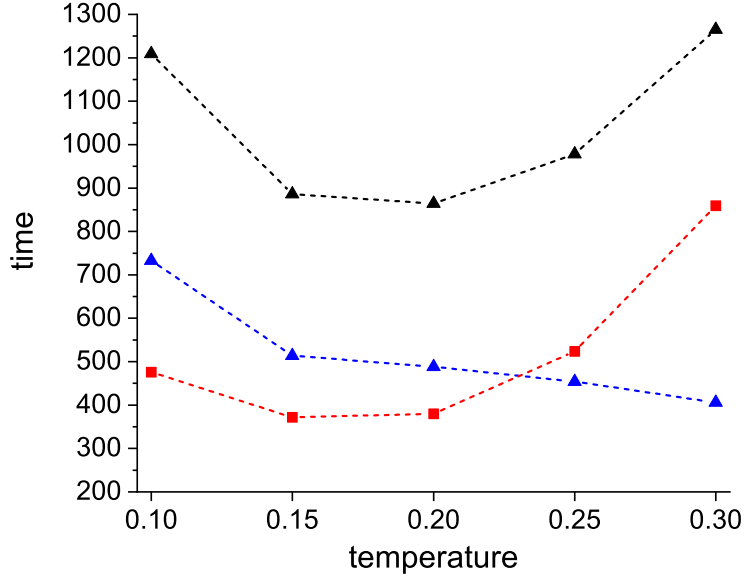

Figure S13: The simulated MFPT times: the  $U \rightarrow NL$  times (blue),  $NL \rightarrow N$  times (red), and  $U \rightarrow N$  times (black). The dashed lines are to guide the eye.

Table S5: Parameters to calculate the  $U \rightarrow NL$  transition time with the Kramers rate formula

| $T$          | 0.1  | 0.15 | 0.2  | 0.25 | 0.3  |
|--------------|------|------|------|------|------|
| $\Delta F$   | 0.25 | 0.32 | 0.38 | 0.41 | 0.38 |
| $F_U''^a$    | 0.27 | 0.25 | 0.24 | 0.22 | 0.24 |
| $F_U''^b$    | 0.29 | 0.29 | 0.24 | 0.21 | 0.24 |
| $F_{TS}''^a$ | 0.14 | 0.16 | 0.21 | 0.26 | 0.28 |
| $F_{TS}''^b$ | 0.21 | 0.18 | 0.23 | 0.27 | 0.31 |
| $D_{TS}$     | 0.35 | 0.50 | 1.1  | 0.90 | 0.95 |

<sup>a</sup> from the polynomial approximation.

<sup>b</sup> calculated as the three-point finite difference.

Table S6: Comparison of folding times

| $T$                                                             | 0.1  | 0.15 | 0.2 | 0.25 | 0.3  |
|-----------------------------------------------------------------|------|------|-----|------|------|
| $\langle t_{\text{U} \rightarrow \text{NL}} \rangle^{\text{a}}$ | 440  | 280  | 285 | 310  | 265  |
| $\langle t_{\text{U} \rightarrow \text{NL}} \rangle^{\text{b}}$ | 472  | 358  | 151 | 159  | 100  |
| $\langle t_{\text{U} \rightarrow \text{NL}} \rangle_{\text{c}}$ | 733  | 514  | 484 | 454  | 406  |
| $\langle t_{\text{NL} \rightarrow \text{N}} \rangle_{\text{c}}$ | 476  | 372  | 380 | 524  | 859  |
| $\langle t_{\text{U} \rightarrow \text{N}} \rangle_{\text{c}}$  | 1209 | 886  | 864 | 978  | 1265 |

<sup>a</sup> calculated from the slope of the simulated U  $\rightarrow$  NL decay curve.

<sup>b</sup> Kramers formula [Eq. (2), the main text] for the average values of  $F_{\text{U}}''$  and  $F_{\text{TS}}''$  (Table S5).

<sup>c</sup> simulated times.



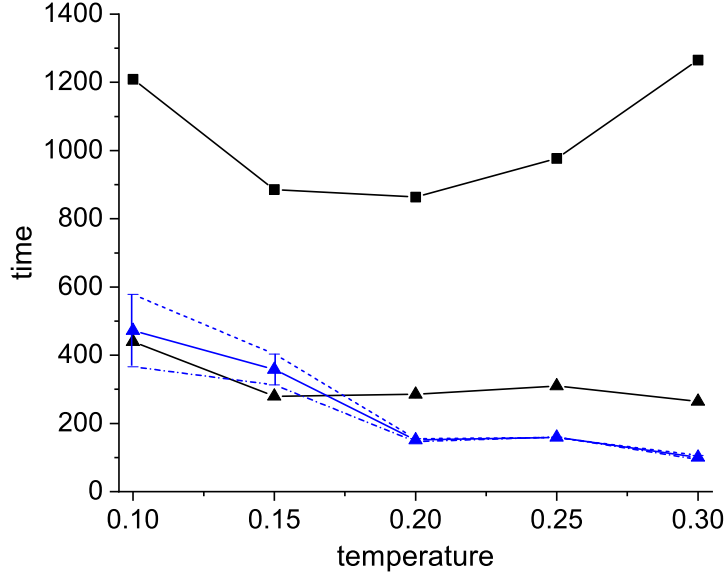

Figure S14: The black squares are for the  $\langle t_{U \rightarrow N} \rangle$  times from simulations, the black triangles denote the  $\langle t_{U \rightarrow NL} \rangle$  times calculated from the slopes of the simulated  $U \rightarrow NL$  decay curves, and the blue triangles are for  $\langle t_{U \rightarrow NL} \rangle$  times from Eq. (2) of the main text with the average values of  $F''_U$  and  $F''_{TS}$  (the dashed and dash-dotted blue lines indicate the results for  $F''_U$  and  $F''_{TS}$  obtained by the polynomial approximation of the FEP and calculated by finite-differences, respectively). In contrast to the cases of  $\gamma = 3M/\tau$  and  $\gamma = 10M/\tau$ , where the diffusion coefficient was calculated from  $\langle R^2(t) \rangle$  at short times, in the given case it was calculated at longer times where  $\langle R^2(t) \rangle \sim t$  (the red dashed curves in Figs. S10 - S12). If the approximation of  $\langle R^2(t) \rangle$  at short times is used (the blue dashed curves), the Kramers times are one order smaller. In all cases, the lines are to guide the eye.

## 6 Different Thresholds to Terminate the MD Trajectories. Friction Constant $\gamma = 10M/\tau$

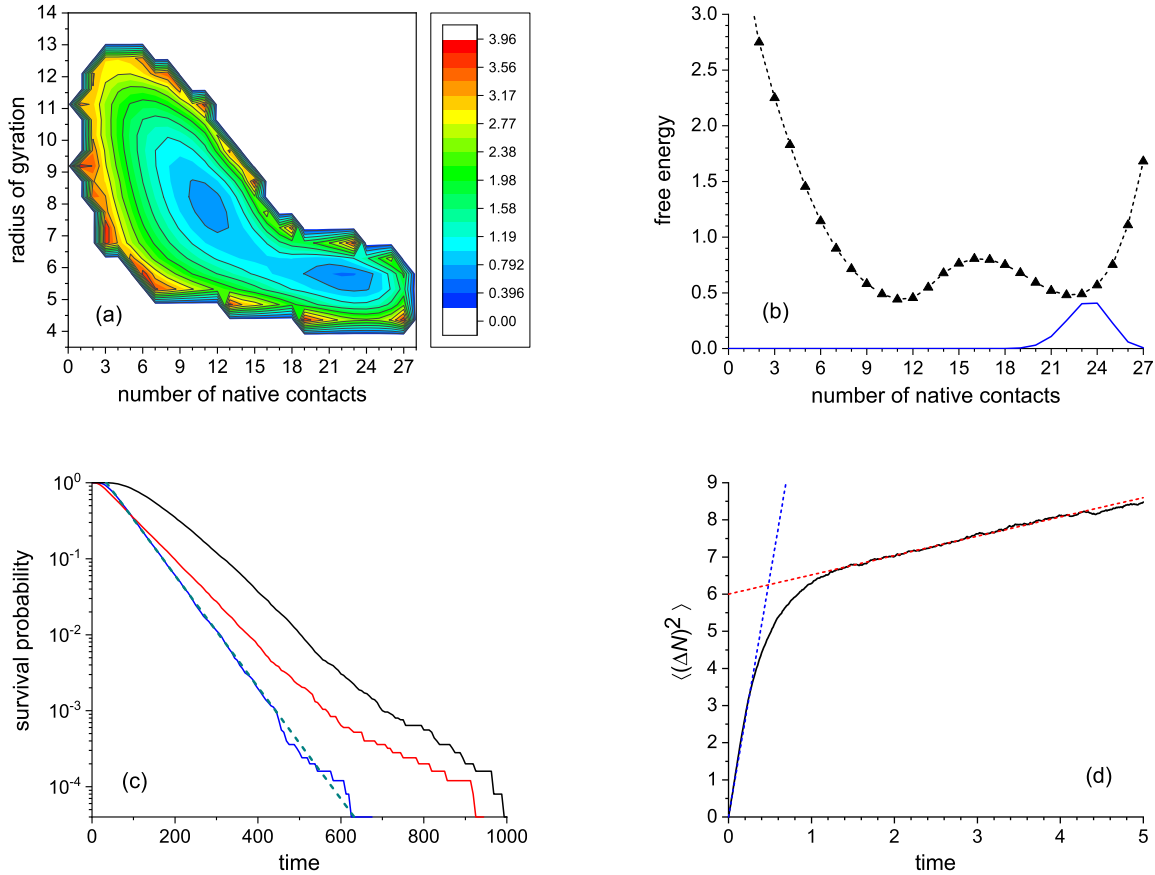

Figure S15: The trajectories were terminated as the RMSD from the native state was less than 1.0 Å;  $T = 0.2$ . **(a)** The free energy surface, and **(b)** free energy profile (black curve) with the normalized distributions of the protein states in the native-state ensemble (blue curve). **(c)** First-passage time distributions in the form of survival probabilities: the U  $\rightarrow$  NL trajectories (blue), the NL  $\rightarrow$  N trajectories (red), and the U-N trajectories (black); the dashed green line denotes an exponential fit to the U  $\rightarrow$  NL distribution. **(d)** The time-dependent mean-square deviation from the transition state in the number of native contacts (black curve); the blue and red dashed lines are the linear fits to the curve for short and long times, respectively.

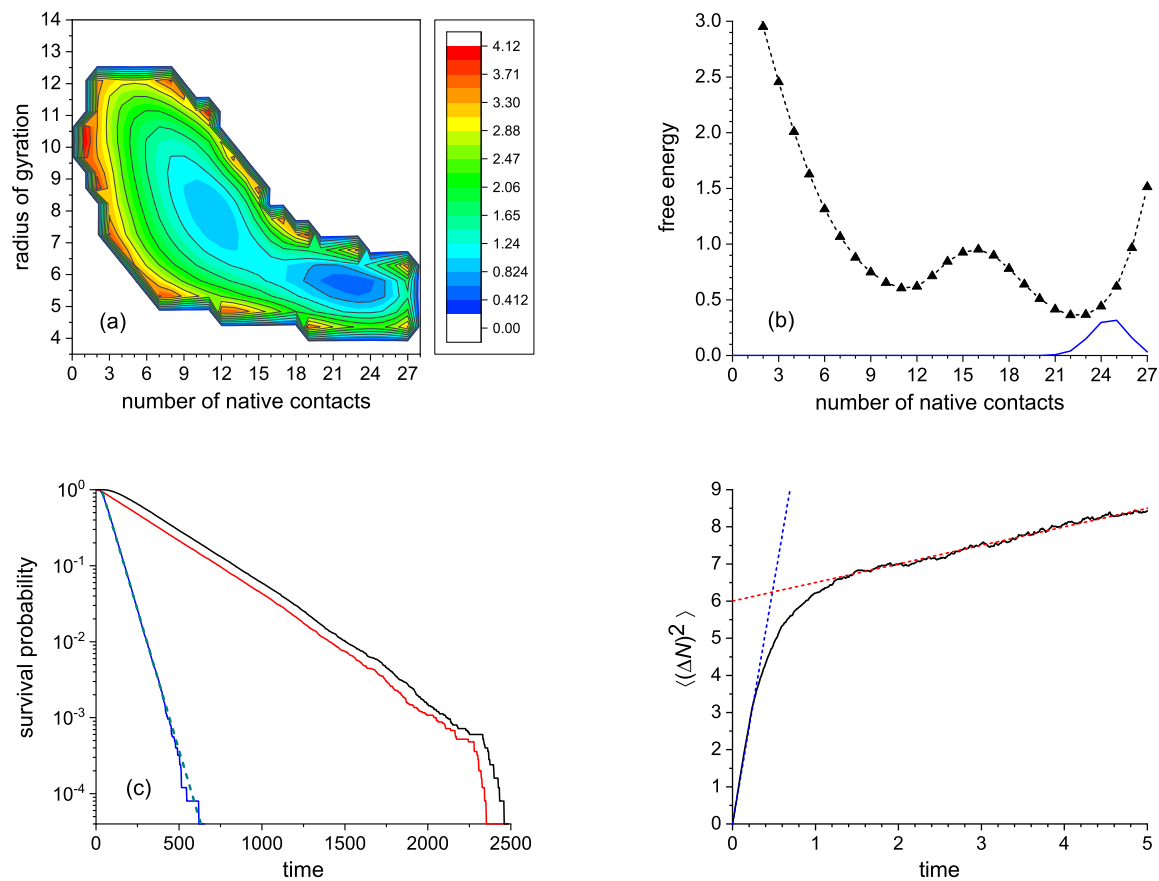

Figure S16: The trajectories were terminated as the RMSD from the native state was less than  $0.65 \text{ \AA}$ ;  $T = 0.2$ . The notations are as in Fig. S15.

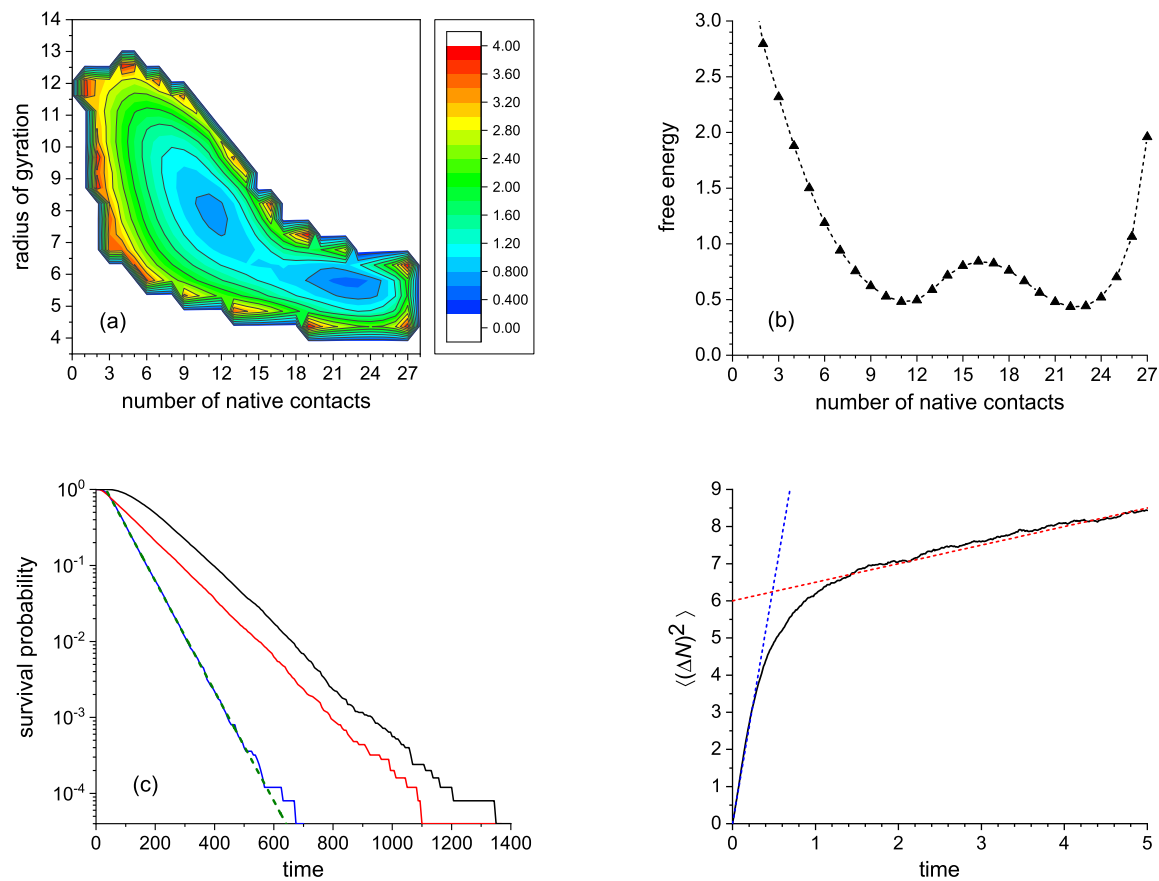

Figure S17: The trajectories were terminated as the number of native contacts  $N_{\text{nat}}$  was equal to the number of native contacts in the native state  $N_{\text{nat}}^{\text{NAT}} = 27$ ;  $T = 0.2$ . The notations are as in Fig. S15.
